# Supplementary material for: Unique Mutational Spectrum of the GJB2 Gene and Its Pathogenic Contribution to Deafness in Tuvinians (Southern Siberia, Russia): A High Prevalence of Rare Variant c.516G>C (p.Trp172Cys)
Source: MDPI journal article supplement (doi:10.3390/genes10060429), 2019-06-05

**Figure S3.** The familial *GJB2* monoallelic cases.

Deaf individuals are shown by black symbols. The patients with *GJB2* monoallelic mutations are shown by blue arrows. The *GJB2* pathogenic variants and the *SLC26A4* pathogenic variants (M1, M2 or M3) are shown by red and green, respectively. Mating types: D x D (including noncomp. D x D), D x N, N x N (see explanation in text).

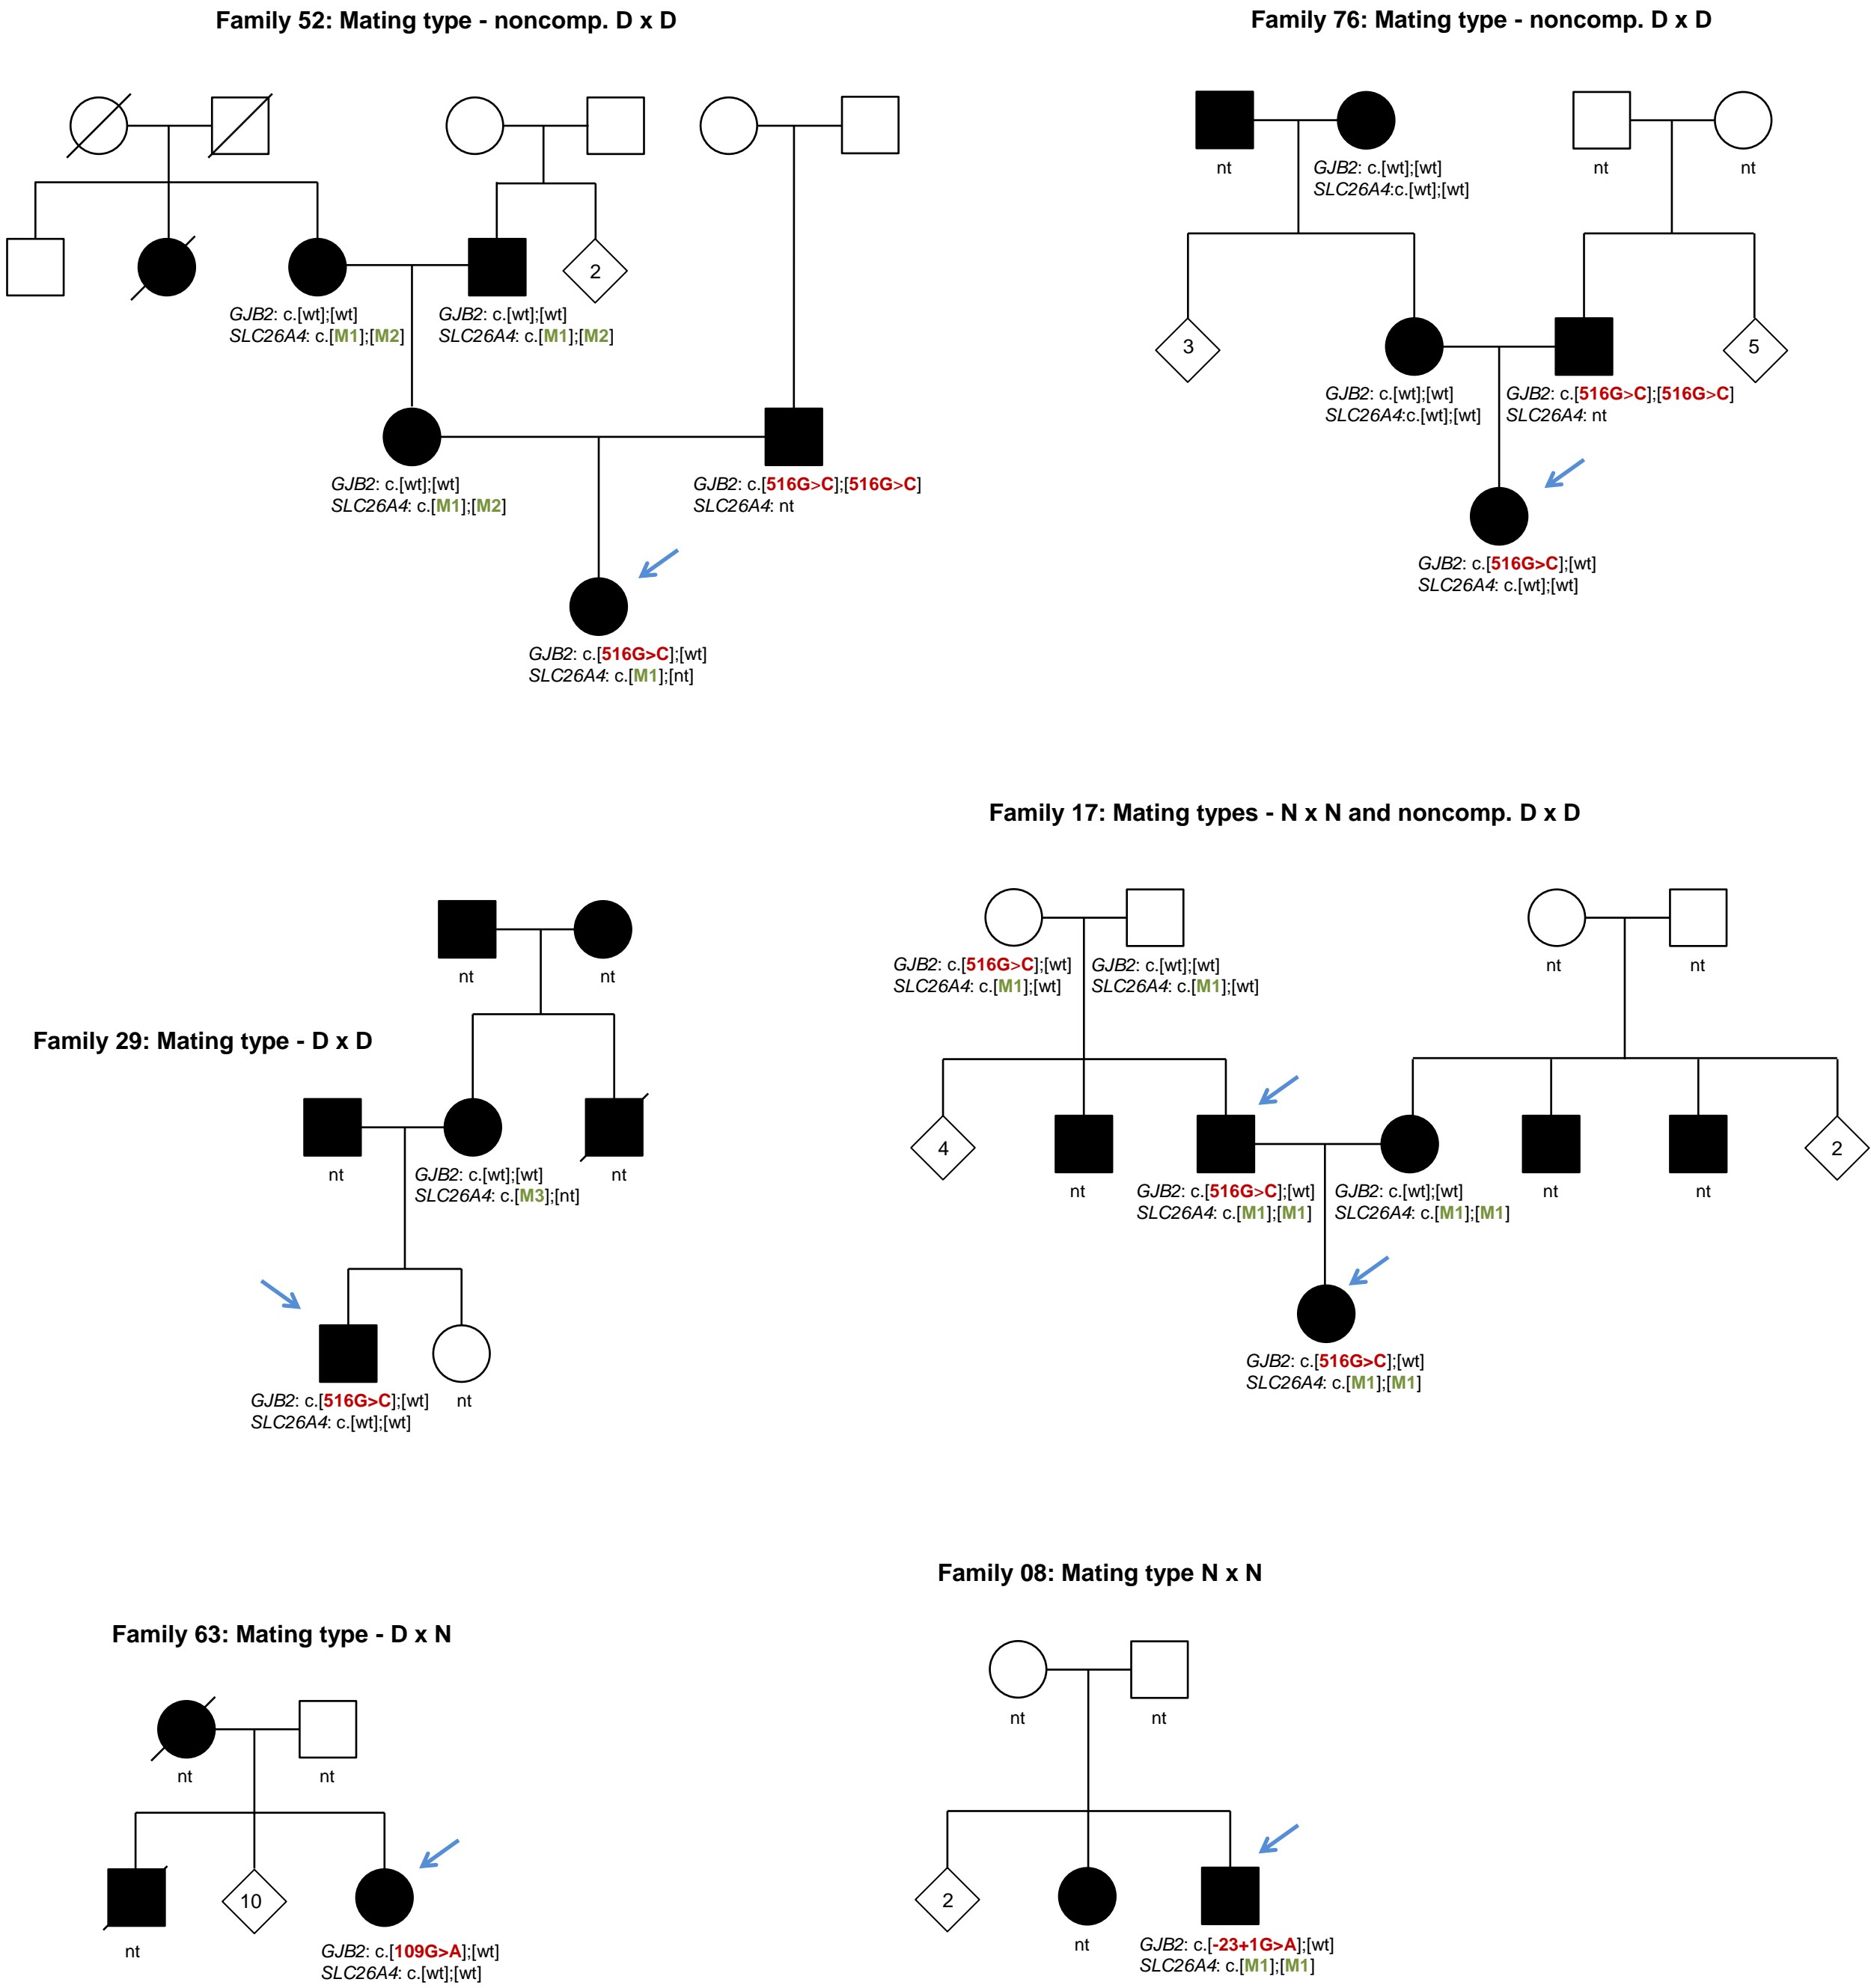

Supplement: s1 [file s1]
