# Supplementary material for: Unique Mutational Spectrum of the GJB2 Gene and Its Pathogenic Contribution to Deafness in Tuvinians (Southern Siberia, Russia): A High Prevalence of Rare Variant c.516G>C (p.Trp172Cys)
Source: MDPI journal article supplement (doi:10.3390/genes10060429), 2019-06-05

**Figure S1.** Verification of *cis*-configuration of variants c.79G>A (p.Val27Ile) and c.341A>G (p.Glu114Gly).

**A.** Verification of *cis*-configuration of variants c.79G>A (p.Val27Ile) and c.341A>G (p.Glu114Gly) by analysis of pedigrees: transmission of allele p.[Val27Ile;Glu114Gly].

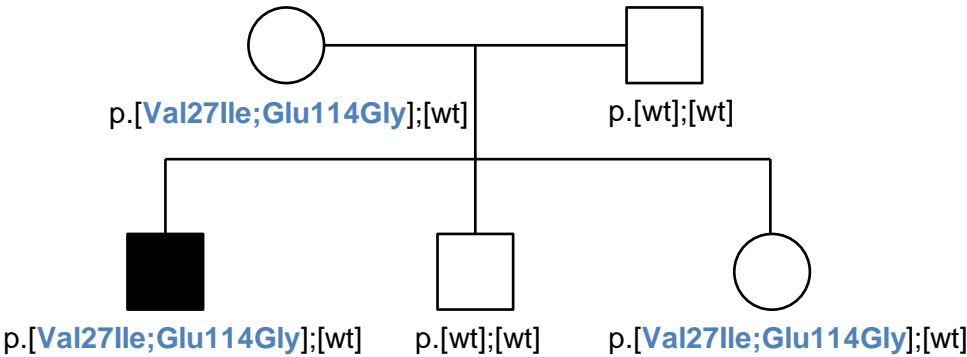

**B.** An example sequencing trace showing variants c.79G>A (p.Val27Ile) and c.341A>G (p.Glu114Gly) in *cis*-configuration. Conjoint presence of these variants in an examined clone confirmed their *cis*-configuration.

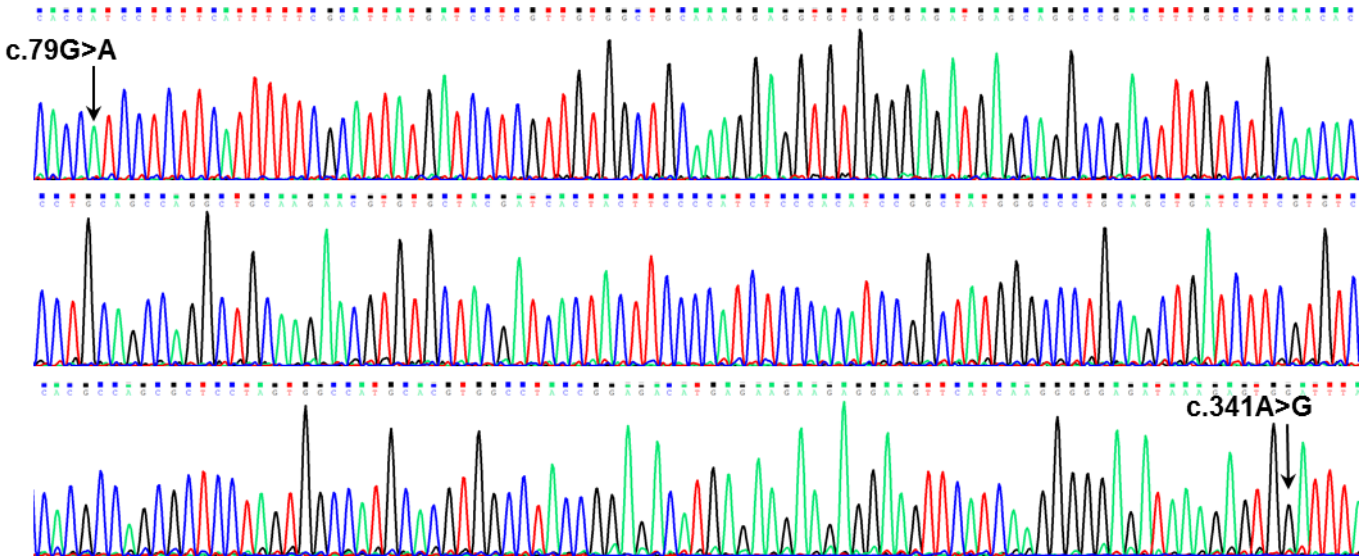

Supplement: s1 [file s1]
